# Supplementary material
Source: PubMed Central journal article supplement (PMC8818021)
Supplement: NIHMS1756272-supplement-3.pdf [file NIHMS1756272-supplement-3.pdf]

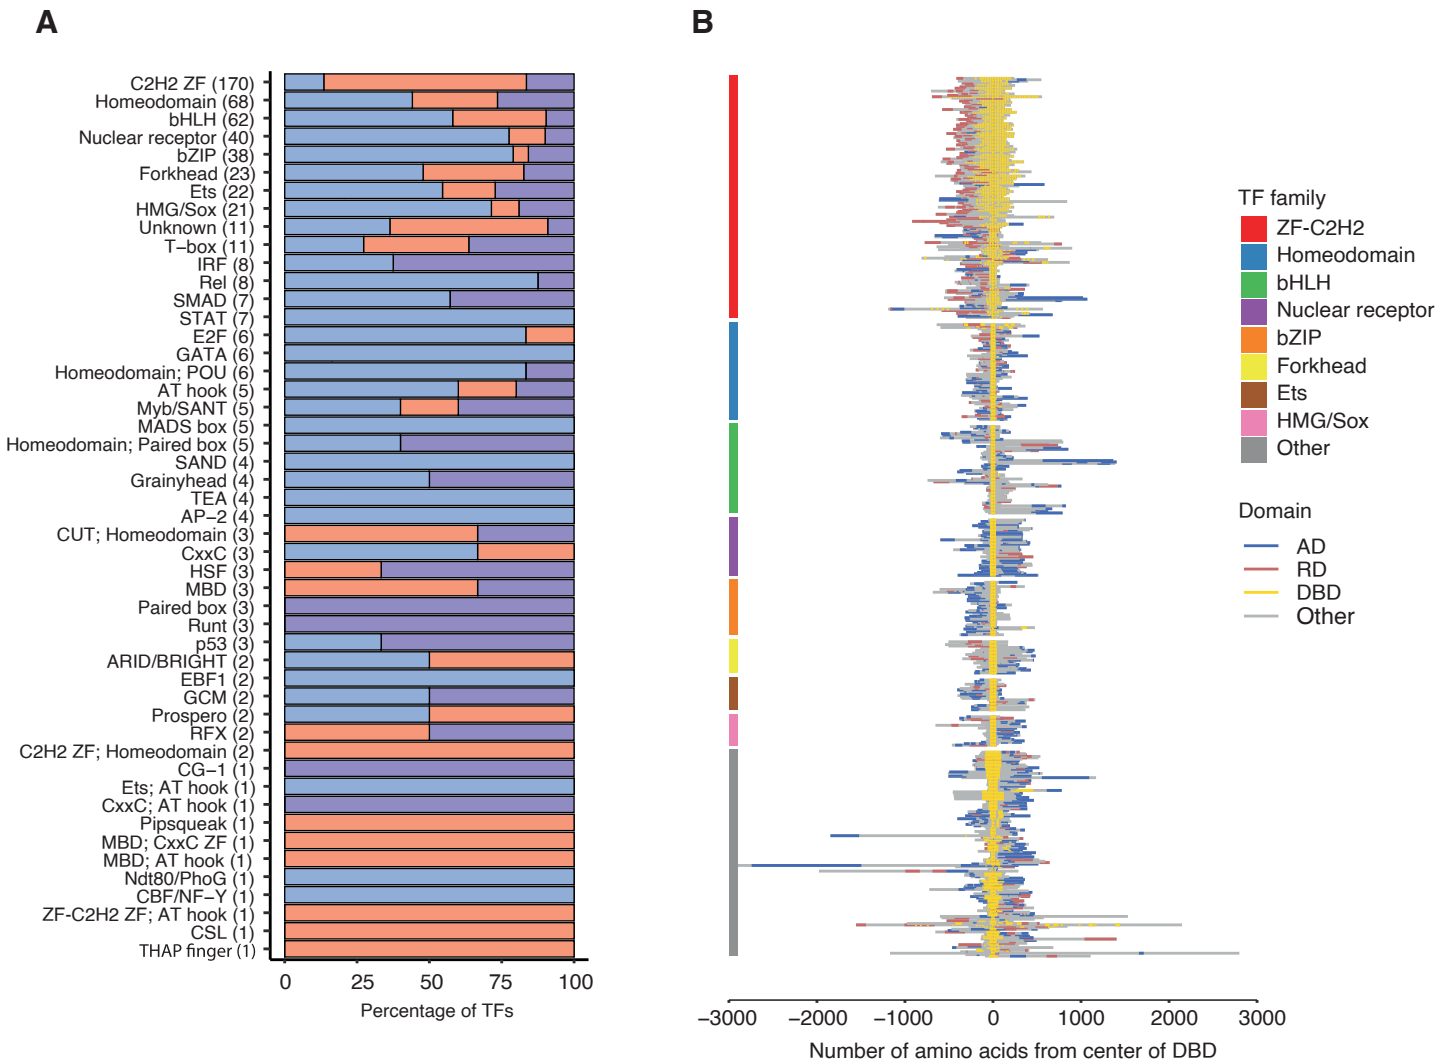

**Figure S1. Distribution and location of effector domains within human TFs, Related to Figure 2.**

(A) Proportion of TFs per family with annotated effector domains, classified as TFs-AD (if they only have ADs annotated), TFs-RD (if the only have RDs annotated), and TFs-Bif (if they have both ADs and RDs or bifunctional domains annotated). The numbers of TFs with annotated effector domains are indicated between parenthesis.

(B) Position of ADs, RDs, and DBDs within the TF amino acid sequence (from N- to C-termini). TF families are indicated by the left bars. TFs are centered at the middle of their DBD.
