# Supplementary material
Source: PubMed Central journal article supplement (PMC8818021)
Supplement: NIHMS1756272-supplement-4.pdf [file NIHMS1756272-supplement-4.pdf]

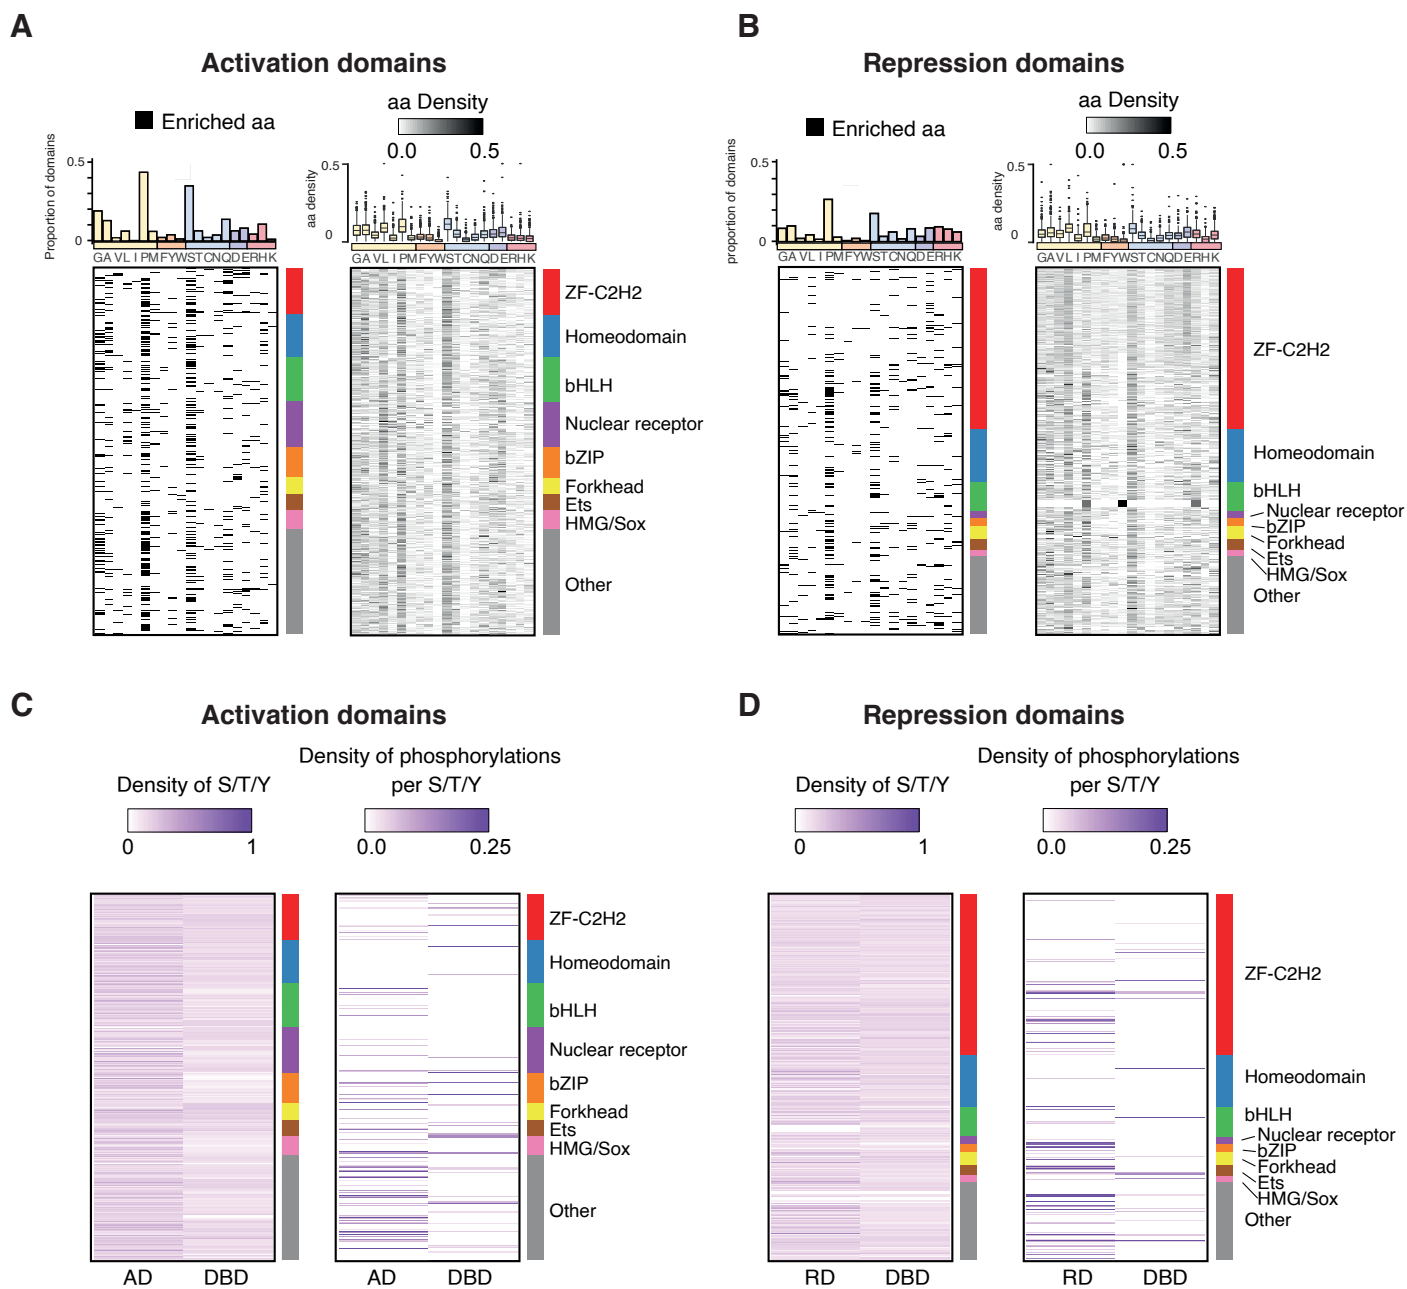

**Figure S2. Amino acid enrichment and phosphorylation of effector domains, Related to Figure 3.**

(A-B) Amino acid enrichment (left) and density of amino acids (right) for ADs (A) and RDs (B). Top bars represent the proportion of domains enriched with each amino acid. The box plots indicate the amino acid density across all domains. Amino acids are grouped by physicochemical properties: yellow - hydrophobic aliphatic, orange - hydrophobic aromatic, blue - hydrophilic polar uncharged, purple - hydrophilic acidic, pink - hydrophilic basic. TF are arranged by TF families indicated on the right bar.

(C-D) Density of serine, threonine, and tyrosine (left) and the density of phosphorylation relative to the number of phosphorylatable amino acids (right) are indicated for ADs (C) and RDs (D).
