# Supplementary material
Source: PubMed Central journal article supplement (PMC8818021)
Supplement: NIHMS1756272-supplement-5.pdf [file NIHMS1756272-supplement-5.pdf]

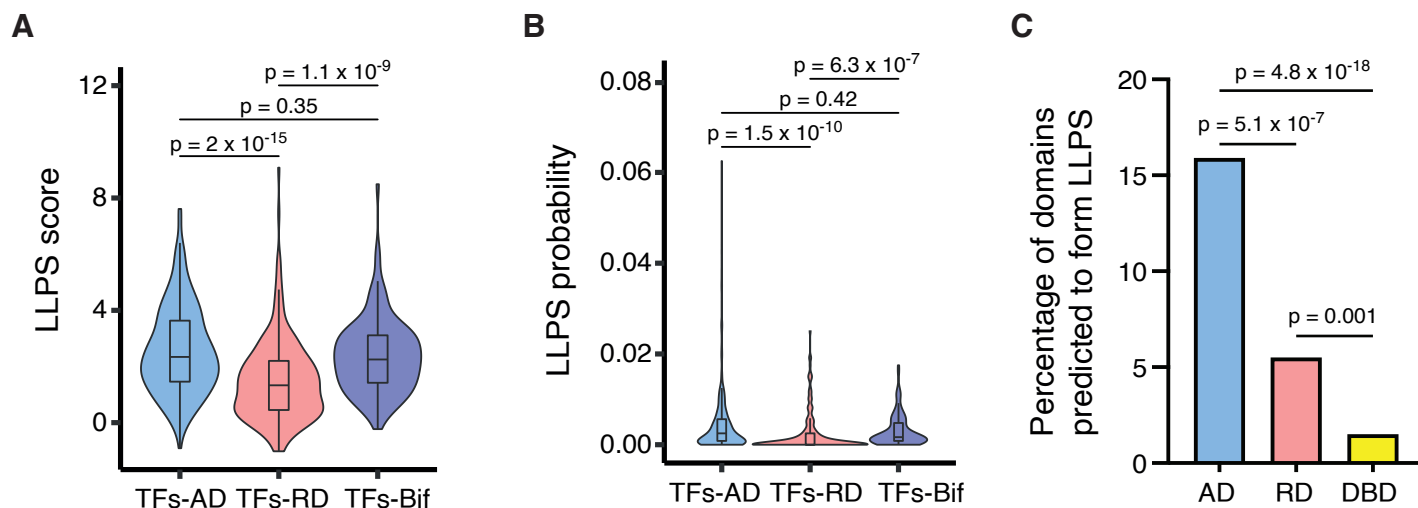

**Figure S3. Liquid-Liquid phase separation (LLPS) predictions of TFs with effector domains, Related to Figure 3.**

(A) Violin plots of LLPS scores as determined in Vernon et al., 2018 for TF-ADs, TF-RDs, and TF-Bif.

(B) Violin plots of LLPS probabilities as determined in van Mierlo et al., 2021 for TF-ADs, TF-RDs, and TF-Bif.

Statistical significance was determined by Wilcoxon test.

(C) Percentage of domains containing amino acid contexts that tend to participate in LLPS as determined in

Vernon et al., 2018 for ADs, RDs, and DBDs. Statistical significance was determined by proportion comparison test.
