# Supplementary material
Source: PubMed Central journal article supplement (PMC8818021)
Supplement: NIHMS1756272-supplement-6.pdf [file NIHMS1756272-supplement-6.pdf]

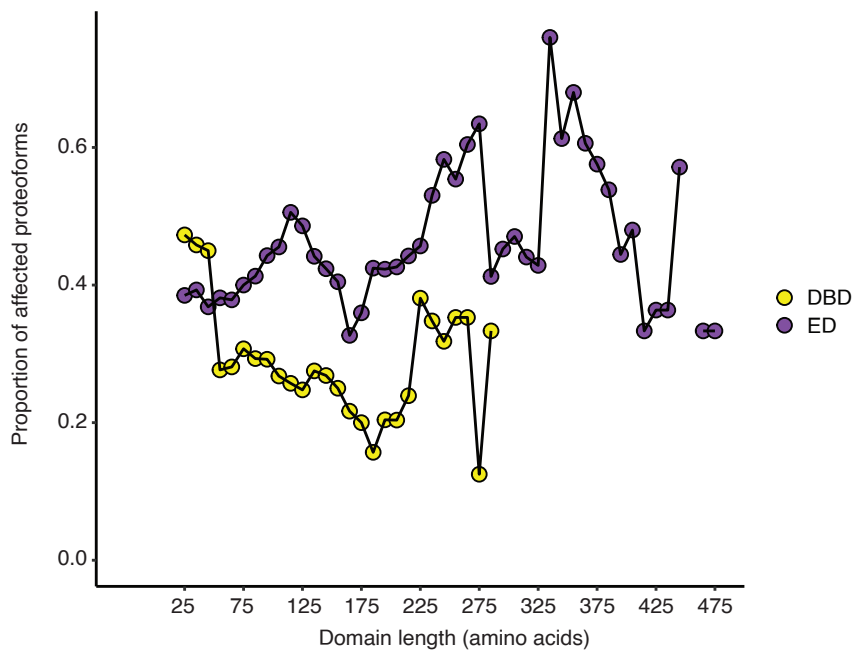

**Figure S4. Relation between domains affected in proteoforms and domain length, Related to Figure 4.**

Proportion of effector domains (purple) and DBDs (yellow) affected in proteoforms for domains of different lengths. Sliding windows of 50 amino acids centered in each length were considered. The x-axis indicates the middle length for each window.
