# Supplementary material
Source: PubMed Central journal article supplement (PMC8818021)
Supplement: NIHMS1756272-supplement-7.pdf [file NIHMS1756272-supplement-7.pdf]

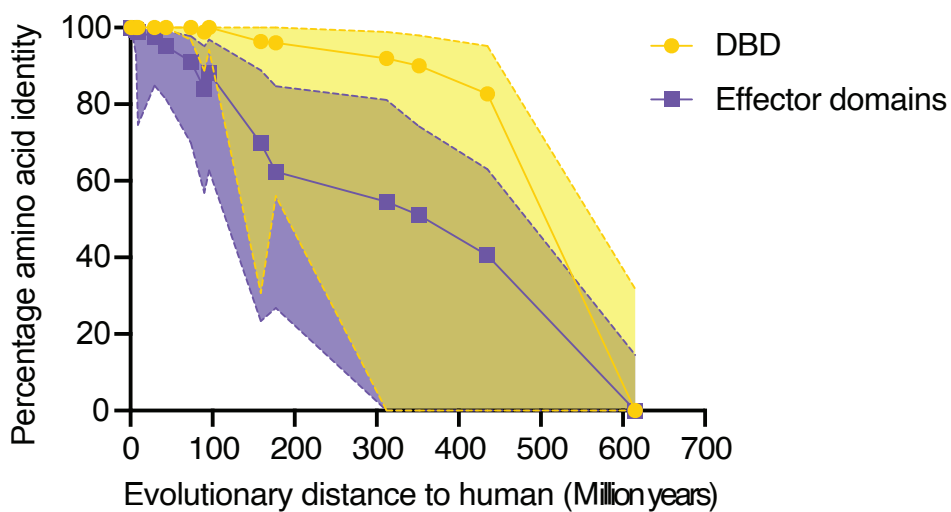

**Figure S5. Evolutionary conservation of effector domains and DBDs, Related to Figure 5.**

Amino acid conservation of effector domains and DBDs is shown in relation to the evolutionary distance to human in millions of years. Median percentage amino acid identities are represented by purple squares (EDs) and yellow circles (DBDs), and interquartile ranges are represented by shaded areas.
