# Supplementary material
Source: PubMed Central journal article supplement (PMC8818021)
Supplement: NIHMS1756272-supplement-8.pdf [file NIHMS1756272-supplement-8.pdf]

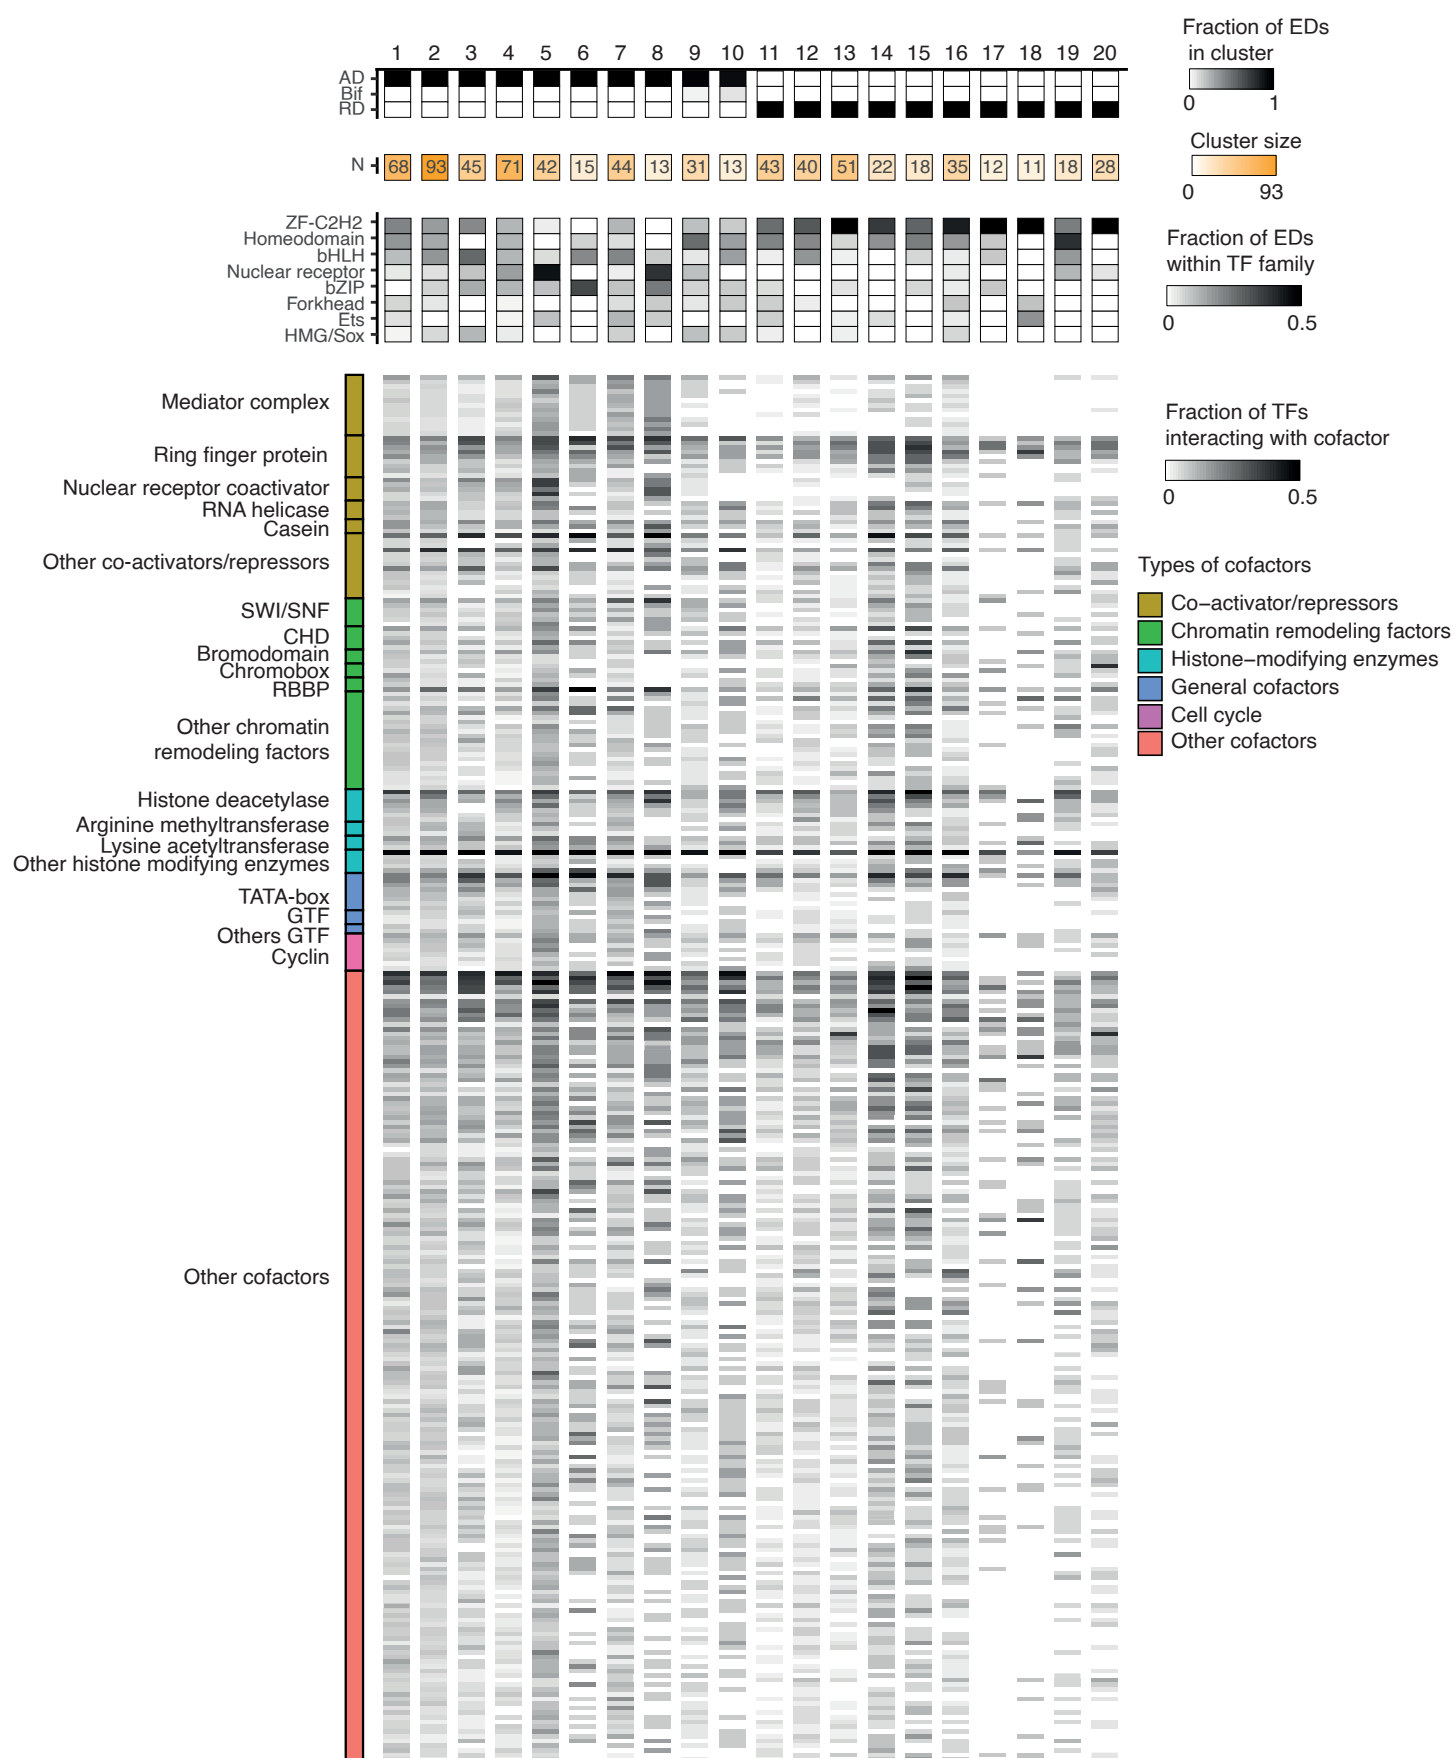

**Figure S6. Interactions between effector domain clusters and cofactors, Related to Figure 6.**

The number of effector domains per cluster is indicated in shades of orange. The fractions of effector domains per cluster in each TF family, or interacting with a cofactor are indicated in shades of gray. Cofactors interacting with at least 5% of TFs are shown and ordered based on their annotated classes according to AnimalTFDB 3.0 (Hu et al., 2019).
